# Supplementary material for: Effect of Commercially Available Wound Irrigation Solutions on Uninfected Host Tissue in a Murine Model
Source: PubMed Central journal article supplement — Arthroplast Today. 2024 Jan 13;25:101300. doi: 10.1016/j.artd.2023.101300 (PMC10826152; doi:10.1016/j.artd.2023.101300), 2024-01-13
Supplement: mmc4.pdf [file mmc4.pdf]

# INDIVIDUAL CONFLICT OF INTEREST STATEMENT

## *American Association of Hip and Knee Surgeons*

(Adopted from the American Academy of Orthopaedic Surgeons disclosure statement)

The following form **must be filled out completely and submitted by each author (example, 6 authors, 6 forms).** **All items require a response. If there is no relevant disclosure for a given item, enter "None."**

---

**Manuscript Title:**

**Effect of Commercially Available Wound Irrigation Solutions on Uninfected Host Tissue in a Murine Model**

---

1. Royalties from a company or supplier (The following conflicts were disclosed)

**Smith and Nephew**

2. Speakers bureau/paid presentations for a company or supplier (The following conflicts were disclosed)

**None**

3A. Paid employee for a company or supplier (The following conflicts were disclosed)

**The CORE Institute**

3B. Paid consultant for a company or supplier (The following conflicts were disclosed)

**Stryker, Smith and Nephew**

3C. Unpaid consultants for a company or supplier (The following conflicts were disclosed)

**None**

4. Stock or stock options in a company or supplier (The following conflicts were disclosed)

**HopCo, Arboretum Ventures**

5. Research support from a company or supplier as a Principal Investigator (The following conflicts were disclosed)

**Ascension Providence, Stryker Orthopedics**

6. Other financial or material support from a company or supplier (The following conflicts were disclosed)

**None**

7. Royalties, financial or material support from publishers (The following conflicts were disclosed)

**None**

8. Medical/Orthopaedic publications editorial/governing board (The following conflicts were disclosed)

**None**

9. Board member/committee appointments for a society (The following conflicts were disclosed)

**Michigan Orthopedic Society, Michigan Arthroplasty Registry Collaborative Quality Initiative**

**Each author must sign AND print or type his/her name, date and submit a separate form**

In addition, one BLINDED Conflict of Interest form (no author names used) should be submitted per manuscript with all author disclosures.

David C. Markel, MD



1/31/2023

---

Author Name (Print or Type)

Author Signature

Date
