# Supplementary material for: Effect of Commercially Available Wound Irrigation Solutions on Uninfected Host Tissue in a Murine Model
Source: PubMed Central journal article supplement — Arthroplast Today. 2024 Jan 13;25:101300. doi: 10.1016/j.artd.2023.101300 (PMC10826152; doi:10.1016/j.artd.2023.101300), 2024-01-13
Supplement: mmc5.pdf [file mmc5.pdf]

# CONFLICT OF INTEREST STATEMENT

## *American Association of Hip and Knee Surgeons*

(Adopted from the American Academy of Orthopaedic Surgeons disclosure statement)

The following form **must be filled out completely and submitted by each author (example, 6 authors, 6 forms).**  
**All items require a response. If there is no relevant disclosure for a given item, enter "None."**

---

Manuscript Title

### **Effect of Commercially Available Wound Irrigation Solutions on Uninfected Host Tissue in a Murine Model**

1. Royalties from a company or supplier (The following conflicts were disclosed)  
**NONE**
  
2. Speakers bureau/paid presentations for a company or supplier (The following conflicts were disclosed)  
**NONE**
  
- 3A. Paid employee for a company or supplier (The following conflicts were disclosed)  
**NONE**
  
- 3B. Paid consultant for a company or supplier (The following conflicts were disclosed)  
**NONE**
  
- 3C. Unpaid consultants for a company or supplier (The following conflicts were disclosed)  
**NONE**
  
4. Stock or stock options in a company or supplier (The following conflicts were disclosed)  
**NONE**
  
5. Research support from a company or supplier as a Principal Investigator (The following conflicts were disclosed)  
**NONE**
  
6. Other financial or material support from a company or supplier (The following conflicts were disclosed)  
**NONE**
  
7. Royalties, financial or material support from publishers (The following conflicts were disclosed)  
**NONE**
  
8. Medical/Orthopaedic publications editorial/governing board (The following conflicts were disclosed)  
**NONE**

9. Board member/committee appointments for a society (The following conflicts were disclosed)  
**NONE**

**Each author must sign AND print or type his/her name, date and submit a separate form**

In addition, one BLINDED Conflict of Interest form (no author names used) should be submitted per manuscript with all author disclosures.

|                             |                                                                                   |         |
|-----------------------------|-----------------------------------------------------------------------------------|---------|
| Dexter Powell, MD           |  | 1/31/23 |
| Author Name (Print or Type) | Author Signature                                                                  | Date    |
